# Supplementary material for: Association between Helicobacter pylori Infection and Nasal Polyps: A Systematic Review and Meta-Analysis
Source: MDPI journal article supplement (doi:10.3390/microorganisms11061581), 2023-06-14
Supplement: s1 [file s1]

**Supplementary Table 2.** Risk of bias assessment using the Newcastle-Ottawa scale

| STUDY               | Representativeness<br>of the exposed<br>cohort | Non-<br>exposed<br>cohort | Ascertainment<br>of exposure | Demonstration<br>that<br>outcome of<br>interest was<br>not present at<br>start of<br>study | Comparability<br>of cases and<br>controls on the<br>basis of the<br>design or<br>analysis | Was follow-<br>up long<br>enough |                          |                          | Total<br>score |
|---------------------|------------------------------------------------|---------------------------|------------------------------|--------------------------------------------------------------------------------------------|-------------------------------------------------------------------------------------------|----------------------------------|--------------------------|--------------------------|----------------|
|                     |                                                |                           |                              |                                                                                            |                                                                                           | Assessment<br>of outcome         | for outcomes<br>to occur | Adequacy of<br>follow up |                |
| Al-Kholy et al      | *                                              | *                         | *                            | *                                                                                          | *                                                                                         | *                                | 0                        | 0                        | 6/8            |
| Bansal et al        | *                                              | *                         | *                            | *                                                                                          | *                                                                                         | *                                | 0                        | 0                        | 6/8            |
| Cvorovic et al      | *                                              | *                         | *                            | *                                                                                          | *                                                                                         | *                                | 0                        | 0                        | 6/8            |
| Khademi et al       | *                                              | *                         | *                            | *                                                                                          | *                                                                                         | *                                | 0                        | 0                        | 6/8            |
| Koc et al           | *                                              | *                         | *                            | *                                                                                          | *                                                                                         | *                                | 0                        | 0                        | 6/8            |
| Özcan et al         | *                                              | *                         | *                            | *                                                                                          | *                                                                                         | *                                | 0                        | 0                        | 6/8            |
| Ozyurt et al        | *                                              | *                         | *                            | *                                                                                          | *                                                                                         | *                                | 0                        | 0                        | 6/8            |
| Shokrollahi et al   | *                                              | *                         | *                            | *                                                                                          | *                                                                                         | *                                | 0                        | 0                        | 6/8            |
| Siupsinskiene et al | *                                              | *                         | *                            | *                                                                                          | *                                                                                         | *                                | 0                        | 0                        | 6/8            |
| Včeva et al         | *                                              | *                         | *                            | *                                                                                          | *                                                                                         | *                                | 0                        | 0                        | 6/8            |
| Burduk et al        | *                                              | *                         | *                            | *                                                                                          | *                                                                                         | *                                | 0                        | 0                        | 6/8            |
| Nemati et al        | *                                              | *                         | *                            | *                                                                                          | *                                                                                         | *                                | 0                        | 0                        | 6/8            |
